# Supplementary material for: Wound care counseling of patients with hidradenitis suppurativa: perspectives of dermatologists
Source: Int J Womens Dermatol. 2023 Jul 18;9(3):e096. doi: 10.1097/JW9.0000000000000096 (PMC10353709; doi:10.1097/JW9.0000000000000096)
Supplement: Supplementary file 1 [file jw9-9-e096-s001.pdf]

Basic Information

How many years have you been practicing out of residency?

< 5 years  
5-10 years  
10-15 years  
15-20 years  
20+ years

What setting best describes your practice?

Academic  
Multi-specialty group practice  
Single specialty group practice  
Solo private practice  
Other

Please specify "other"

Where is your practice located?

Northeast (Connecticut, Maine, Massachusetts, New Hampshire, New Jersey, New York, Pennsylvania, Rhode Island and Vermont)  
West (Arizona, California, Colorado, Idaho, Montana, New Mexico, Nevada, Oregon, Utah, Washington and Wyoming)  
Midwest (Illinois, Indiana, Iowa, Kansas, Michigan, Minnesota, Missouri, Nebraska, North Dakota, Ohio, South Dakota and Wisconsin)  
South (Alabama, Arkansas, Delaware, District of Columbia, Florida, Georgia, Kentucky, Louisiana, Maryland, Mississippi, North Carolina, Oklahoma, South Carolina, Tennessee, Texas, Virginia and West Virginia)  
Noncontiguous states/territories (Alaska, Hawaii, Puerto Rico)  
Other

Please specify "other"

What setting is your practice located?

Rural  
Urban  
Suburban

Do you consider yourself an HS expert?

Yes  
No

What procedures do you perform for HS? Select all that apply.

Intralesional steroid injections  
Deroofing  
Local excisions  
Laser hair removal  
Ablative laser  
None of the above

Wound Care Counseling & Recommendations

Do you counsel your HS patients on wound care management strategies?

Yes  
No  
Sometimes

What topics do you regularly discuss with your patients? Select all that apply.

Types of wound care dressings for daily wound care  
Management of inflamed nodules or abscesses  
Clothing choices  
When to call the office or go to the emergency department  
Dangers of self-lancing or squeezing abscesses  
Other

Please specific "other"

Do you feel that patients with HS are well-educated about wound care dressings and strategies?

Yes  
No

How many minutes on average do you spend per visit counseling on wound care for HS patients?

< 2 minutes  
2-5 minutes  
> 5 minutes

Do you feel that patients should get more education and counseling on wound care dressings and at-home management of acute nodules?

Yes  
No

Do you order wound care supplies for HS patients?

Yes  
No  
Sometimes

Which wound care supplies do you typically prescribe?

Which of the following do you recommend to your patients for daily drainage and symptoms? Select all that apply.

Tissues or toilet paper  
Gauze dressing  
Abdominal pads  
Antiseptic dressing  
Panty liners/sanitary pads  
Adult diapers  
Other:  
I do not counsel on wound care dressings

Please specify "other"

Do you counsel your HS patients on clothing choices or modifications?

All my patients  
Some of my patients  
None of my patients

What specific clothing products or modifications do you counsel HS patients about? Select all that apply.

Boxer shorts / Boy shorts  
Wireless bras  
Seamless pants  
Bra liner  
Abdominal liner  
Hidrawear crop top or similar  
Other:

Please specify "other"

Do you discuss any of the following products with your HS patients for at-home management of acute nodules?

Manuka honey  
Vick's VapoRub  
Warm compress  
Epsom salt bath  
Bleach or chlorine bath  
PRID Homeopathic Drawing Salve  
Ichthammol  
Boil Ease or benzocaine ointment  
Desitin or diaper rash paste (zinc oxide)  
Magnesium sulfate paste  
EmuAid  
Witch hazel  
Tea tree oil  
Turmeric Paste  
Other  
None of the above

Please specify "other"

How effective do you think the following are for at-home management of acute HS nodules?

|                                | 1 = Poor | 2 | 3 = Average | 4 | 5 = Excellent | Do not know |
|--------------------------------|----------|---|-------------|---|---------------|-------------|
| Manuka Honey                   |          |   |             |   |               |             |
| Vick's VapoRub                 |          |   |             |   |               |             |
| Warm compress                  |          |   |             |   |               |             |
| Epsom salt bath                |          |   |             |   |               |             |
| PRID Homeopathic Drawing       |          |   |             |   |               |             |
| Ichthammol                     |          |   |             |   |               |             |
| Boil Ease or benzocaine        |          |   |             |   |               |             |
| Magnesium sulfate paste        |          |   |             |   |               |             |
| Diaper rash paste (zinc oxide) |          |   |             |   |               |             |
| EmuAid                         |          |   |             |   |               |             |
| Witch Hazel                    |          |   |             |   |               |             |
| Tea tree oil                   |          |   |             |   |               |             |
| Bleach/chlorine bath           |          |   |             |   |               |             |
| Turmeric paste                 |          |   |             |   |               |             |
